# Supplementary material for: Plasmon photothermal-promoted solar photocatalytic hydrogen production over a CoCr2O4/g-C3N4heterojunction
Source: Royal Society of Chemistry journal article supplement (doi:10.1039/d2ta05712c), 2022-01-01
Supplement: d2ta05712c1.pdf [file d2ta05712c1.pdf]

## Electronic Supplementary Information

### **Plasmon photothermal-promoted solar photocatalytic hydrogen production over $\text{CoCr}_2\text{O}_4/\text{g-C}_3\text{N}_4$ heterojunction**

Renzhi Xiong, Changcun Tang, Kunjiao Li, Jiabao Wan, Weifeng Jia, Yanhe Xiao,

Baochang Cheng and Shuijin Lei\*

*School of Physics and Materials Science, Nanchang University, Nanchang, Jiangxi 330031,*

*P. R. China*

\*To whom correspondence should be addressed. E-mail: [shjlei@ncu.edu.cn](mailto:shjlei@ncu.edu.cn)

## Supplementary Figures

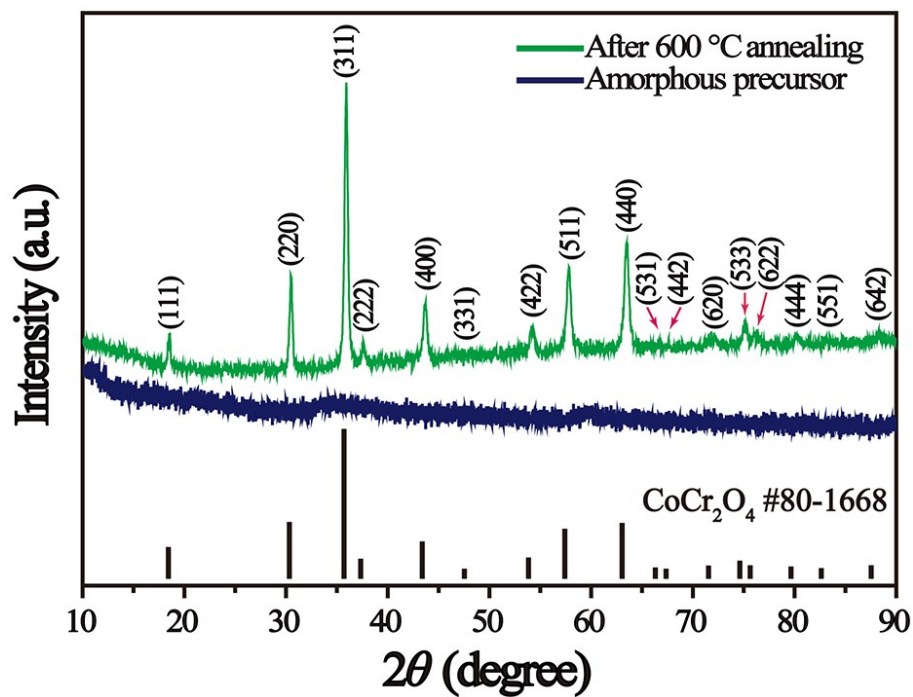

Fig. S1 XRD patterns of the  $\text{CoCr}_2\text{O}_4$  sample before and after annealing.

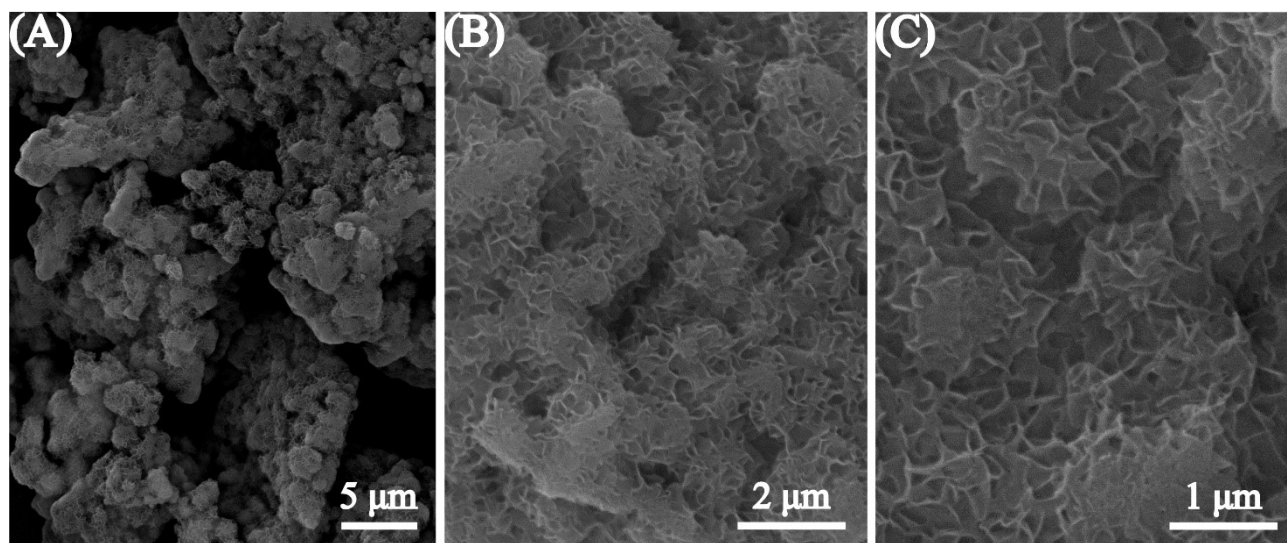

Fig. S2 SEM images of the amorphous  $\text{CoCr}_2\text{O}_4$  precursor.

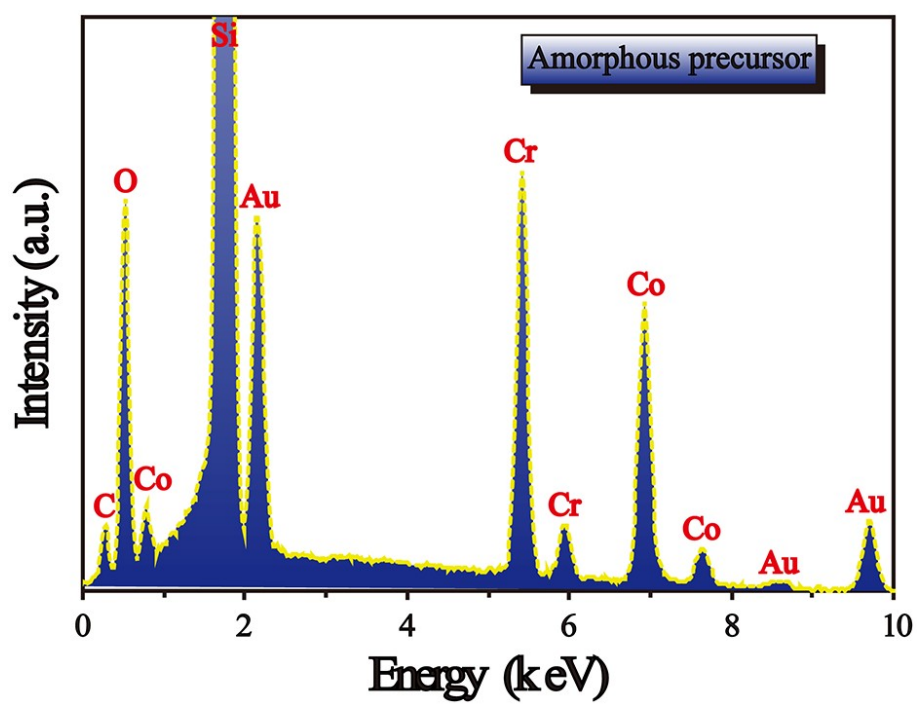

Fig. S3 EDS spectrum of the amorphous  $\text{CoCr}_2\text{O}_4$  precursor.

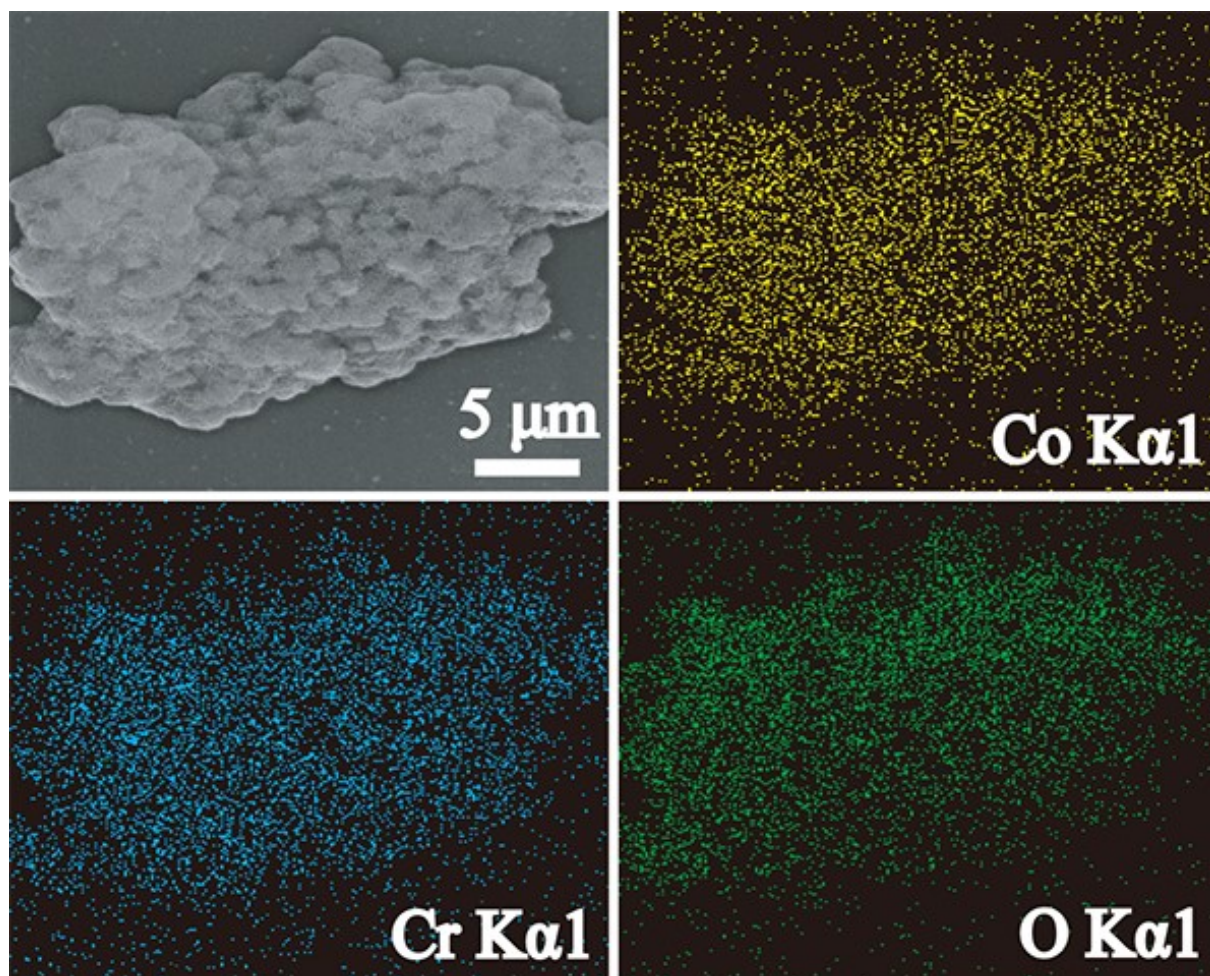

**Fig. S4** EDS elemental mapping images of the amorphous  $\text{CoCr}_2\text{O}_4$  precursor.

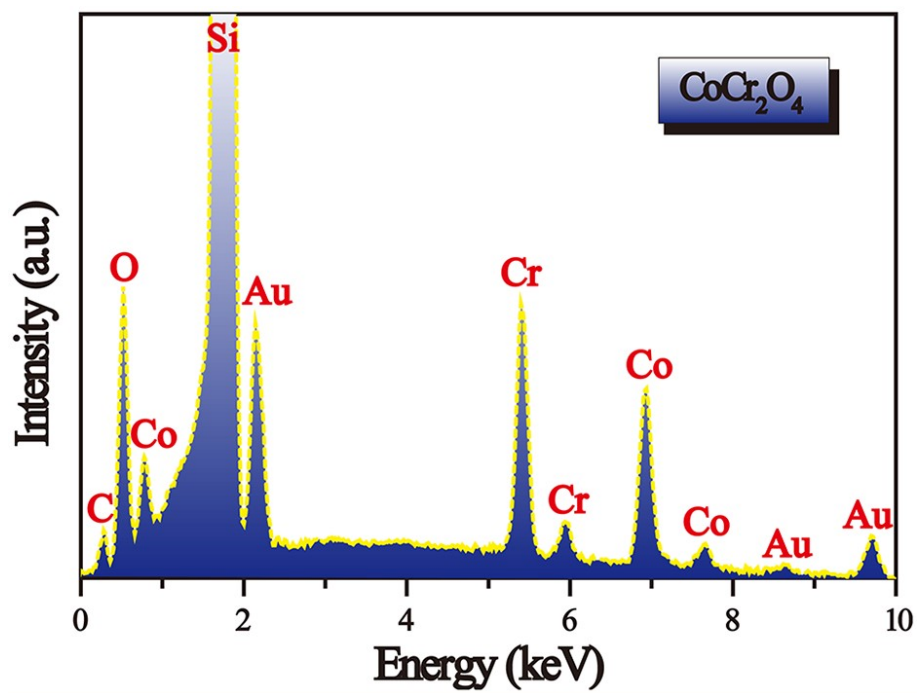

Fig. S5 EDS spectrum of the  $\text{CoCr}_2\text{O}_4$  sample after annealing at 600 °C.

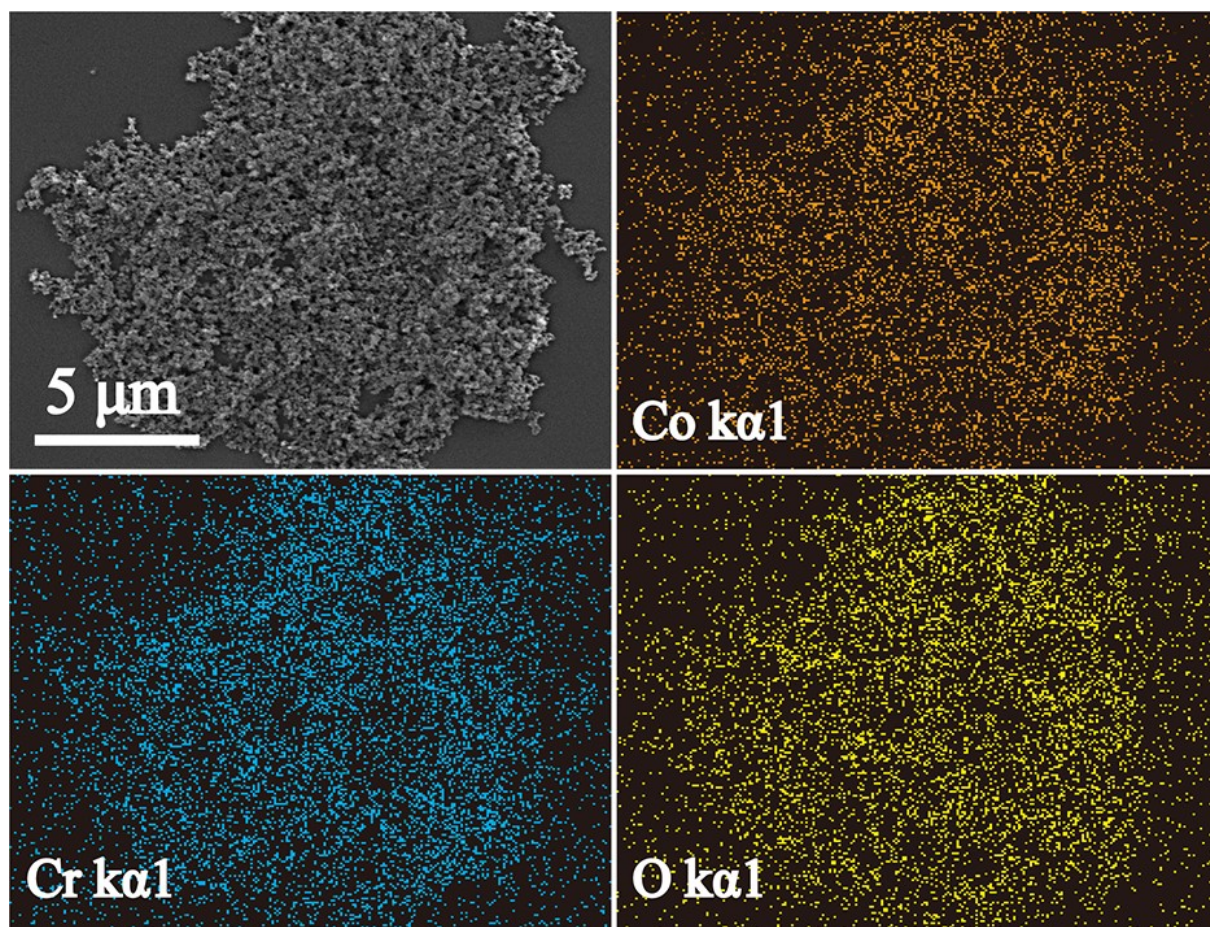

**Fig. S6** EDS elemental mapping images of the  $\text{CoCr}_2\text{O}_4$  sample after annealing at  $600\text{ }^\circ\text{C}$ .

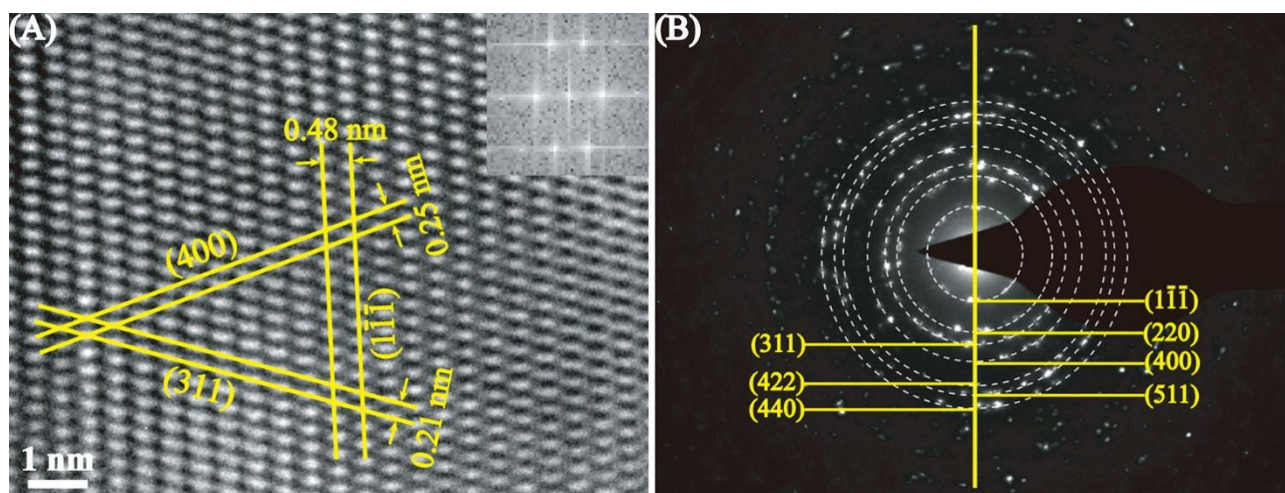

**Fig. S7** (A) HRTEM image (inset: the corresponding FFT patterns) and (B) SAED patterns of the  $\text{CoCr}_2\text{O}_4$  sample after annealing at 600 °C.



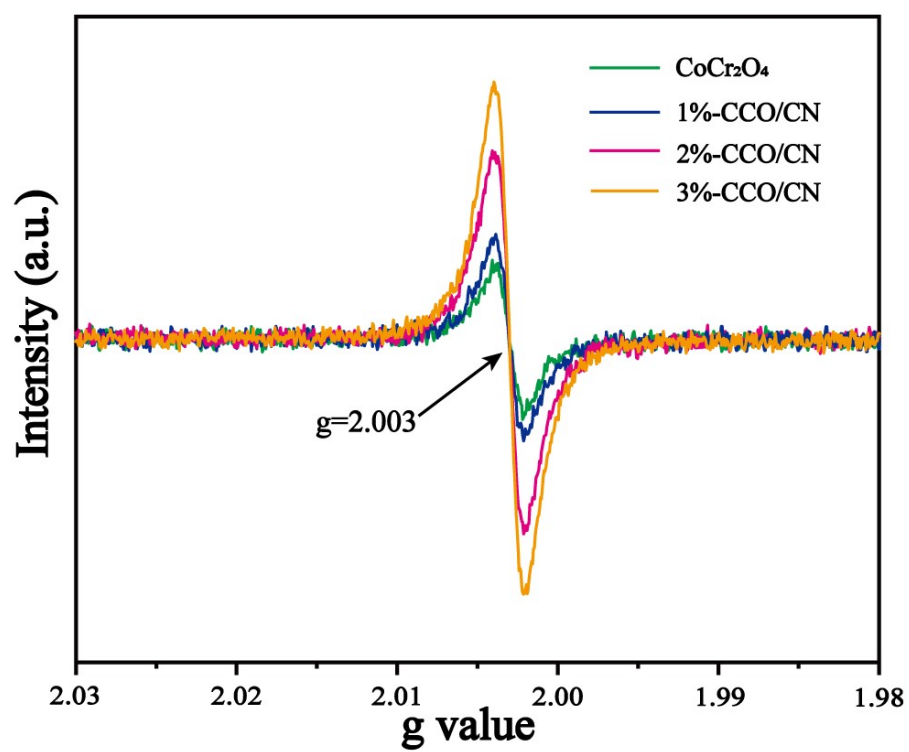

**Fig. S8** EPR spectra of the  $\text{CoCr}_2\text{O}_4$ , 1%-CCO/CN, 2%-CCO/CN, and 3%-CCO/CN samples.

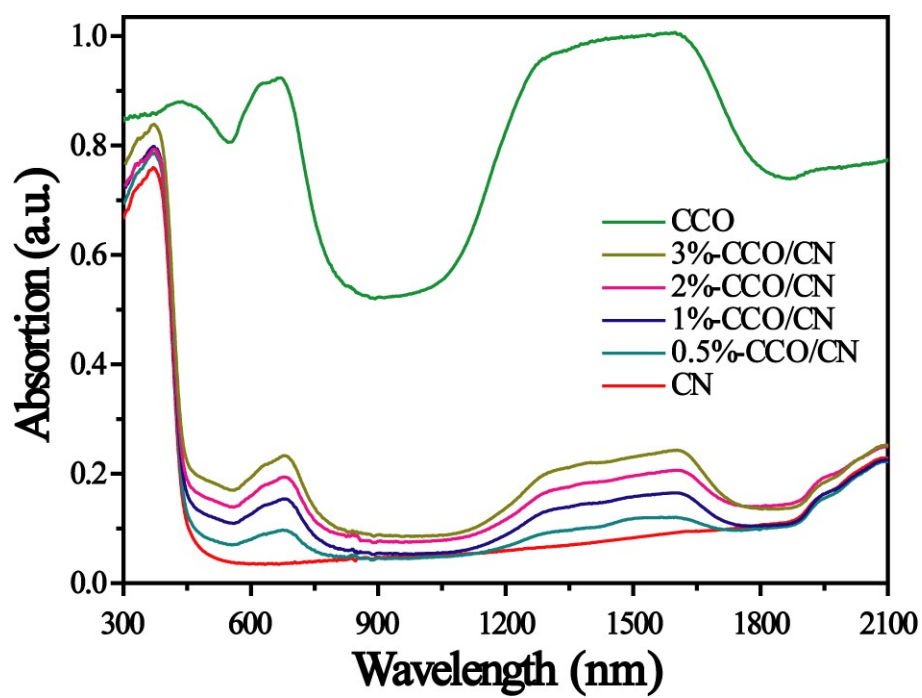

**Fig. S9** The full spectra of UV-Vis-NIR absorption of all the fabricated samples.

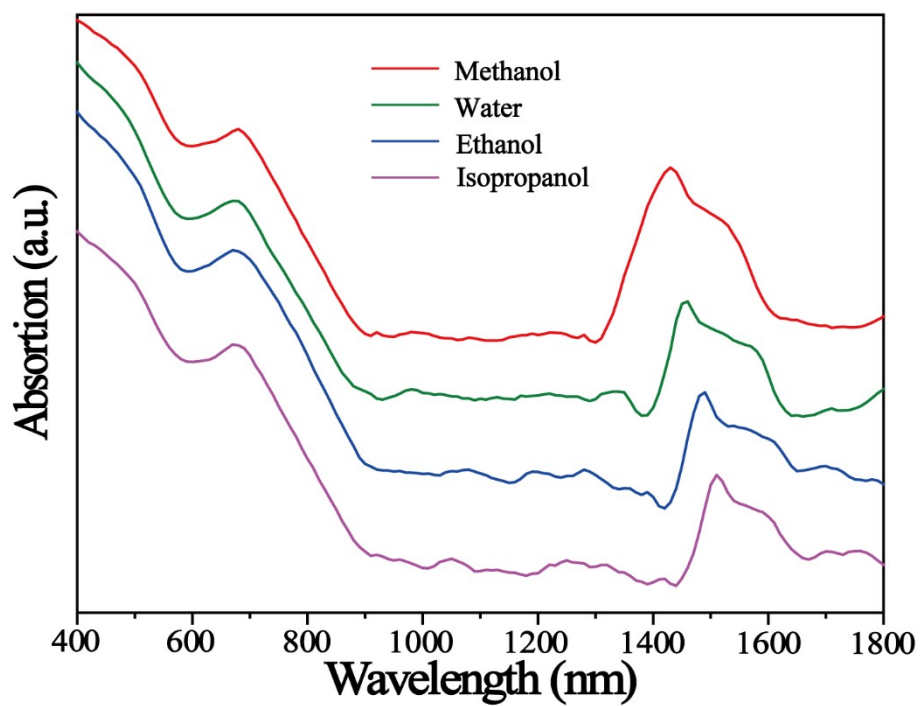

**Fig. S10** Solution-phase UV-Vis-NIR absorption spectra of the prepared CoCr<sub>2</sub>O<sub>4</sub> nanoparticles dispersed in diverse solvents with different refractive indices.

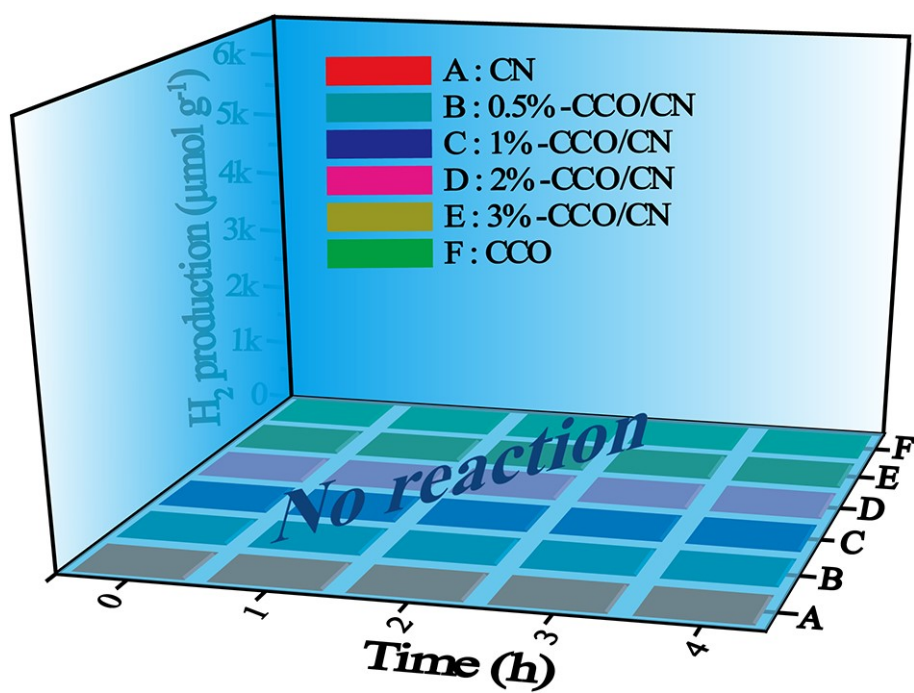

**Fig. S11** The photocatalytic hydrogen production activity of all the fabricated samples under IR illumination.

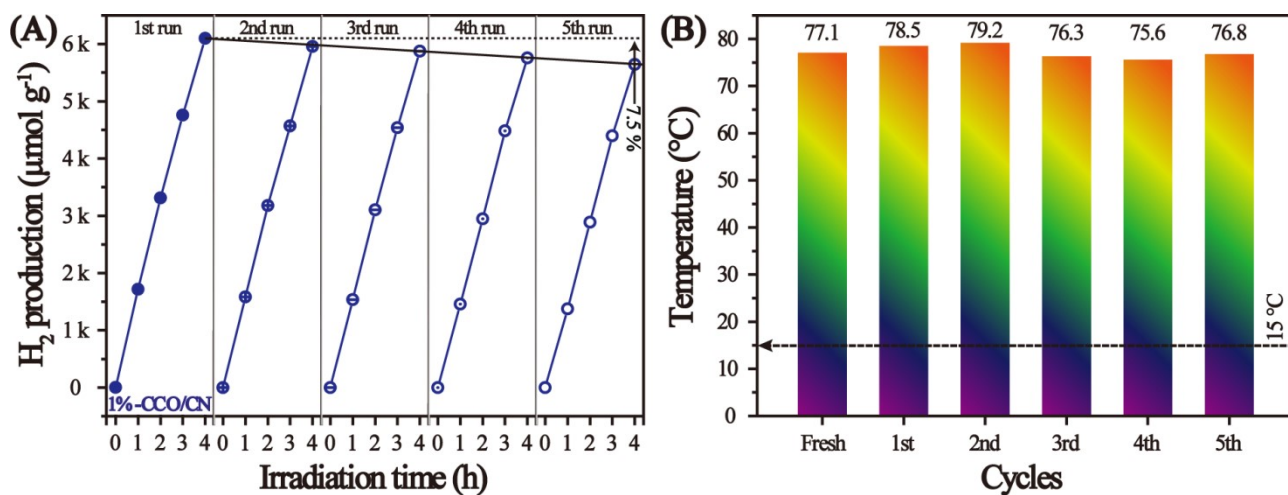

**Fig. S12** (A) Cycling runs for the photocatalytic hydrogen production in presence of the 1%-CCO/CN photocatalyst and (B) the corresponding photothermal induced surface temperature of the recycled 1%-CCO/CN photocatalyst after each cycle.

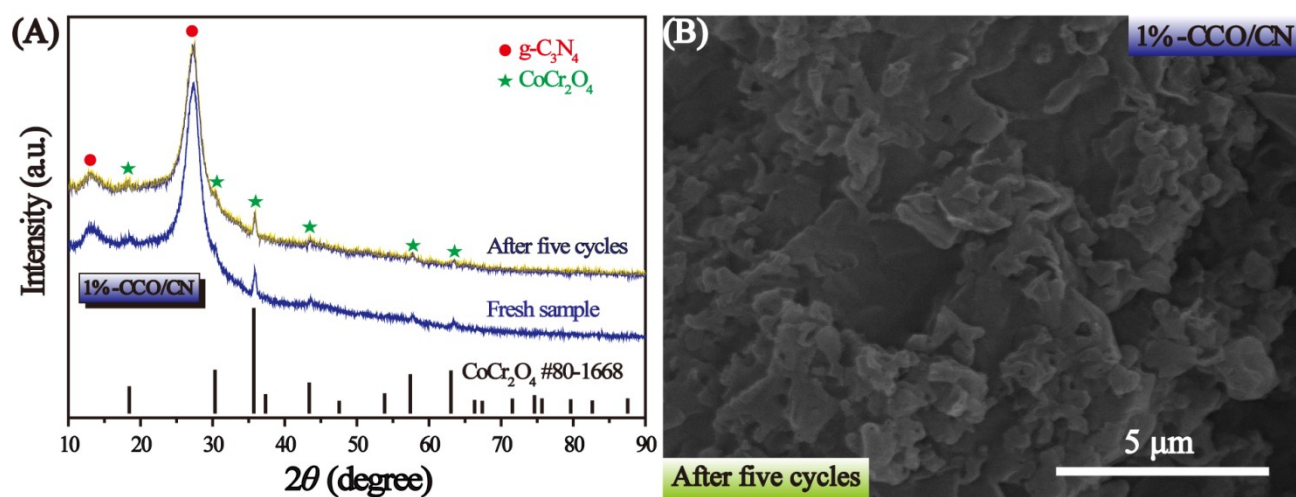

**Fig. S13** (A) XRD patterns of 1%-CCO/CN before and after five runs of photocatalytic hydrogen production, and (B) SEM image of 1%-CCO/CN after five cycles of photocatalytic hydrogen production.

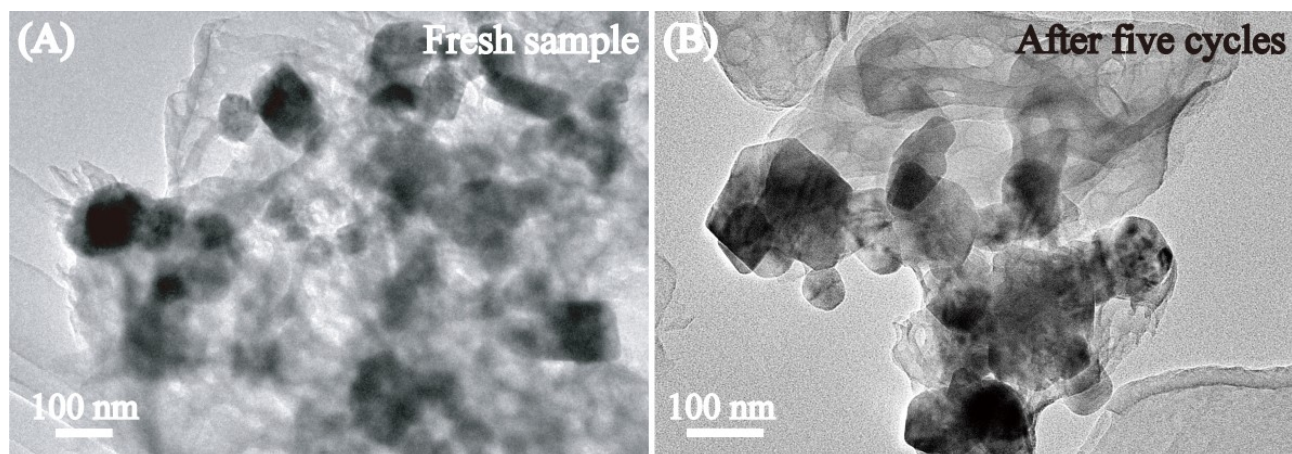

**Fig. S14** TEM images of the 1%-CCO/CN sample (A) before photocatalytic reactions, and (B) after five runs of photocatalytic hydrogen production.

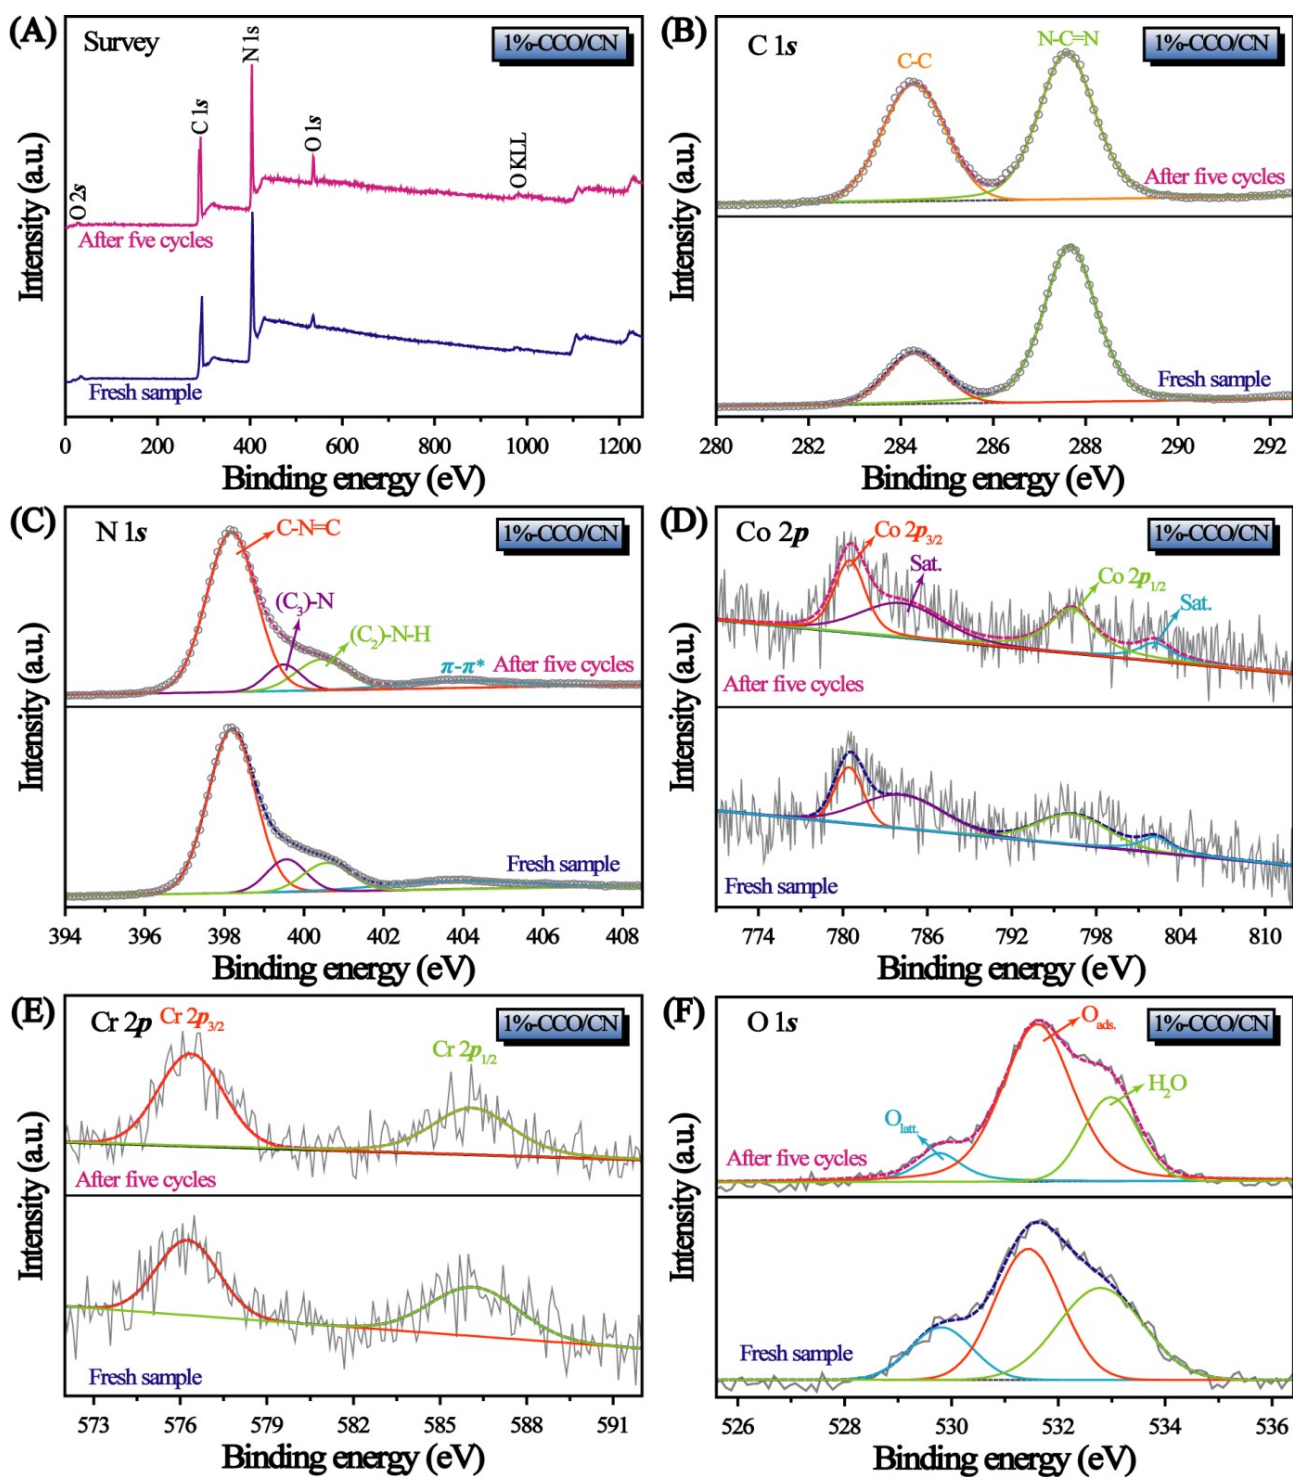

Fig. S15 XPS spectra of the 1%-CCO/CN sample before and after five runs of photocatalytic hydrogen production: (A) survey spectra, and the core-level spectra of (B) C 1s, (C) N 1s, (D) Co 2p, (E) Cr 2p, and (F) O 1s.



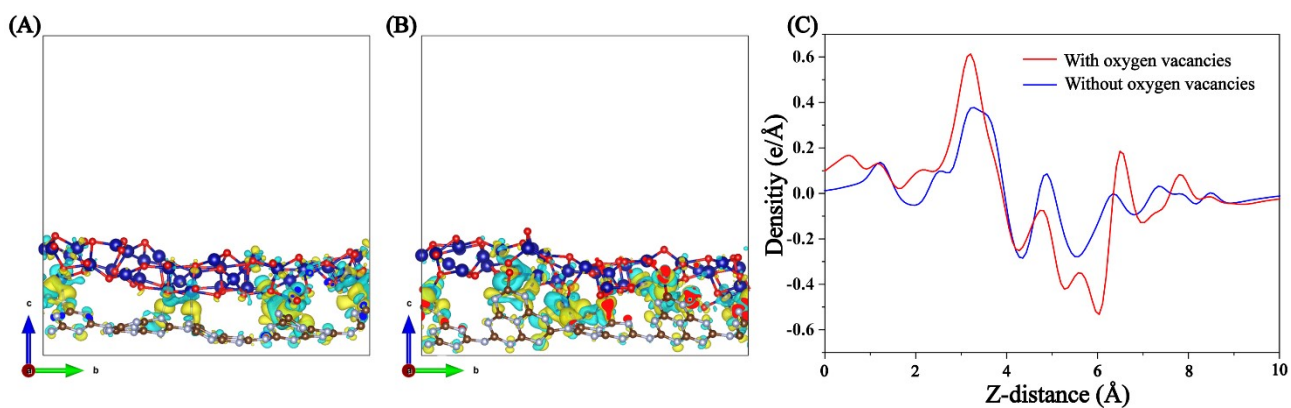

**Fig. S16** The charge density difference for the CoCr<sub>2</sub>O<sub>4</sub>/g-C<sub>3</sub>N<sub>4</sub> heterostructures (A) without oxygen vacancies and (b) with few oxygen vacancies. The cyan and yellow areas represent electron depletion and accumulation, respectively. (C) Planar-averaged electron density along the Z direction for the CoCr<sub>2</sub>O<sub>4</sub>/g-C<sub>3</sub>N<sub>4</sub> heterostructures without and with oxygen vacancies.
